# Supplementary material for: Azithromycin and hydroxychloroquine in hospitalised patients with confirmed COVID-19: a randomised double-blinded placebo-controlled trial
Source: PubMed Central journal article supplement — Eur Respir J. 2022 Jan 6;59(1):2100752. doi: 10.1183/13993003.00752-2021 (PMC8186006; doi:10.1183/13993003.00752-2021), 2022-01-06

## Supplemental Appendix 3 - Online Content

### Proactive protection with azithromycin and hydroxychloroquine in hospitalised patients with COVID-19 (ProPAC-COVID): A randomised clinical trial

#### Authors:

The members of the writing group (Pradeesh Sivapalan, M.D., Ph.D., Charlotte Suppli Ulrik, M.D., D.M.Sc., Therese Sophie Lapperre, M.D., Ph.D., Rasmus Dahlin Bojesen, M.D., Ph.D., Josefin Eklöf, M.D., Ph.D., Andrea Browatzki, M.D., Jon Torgny Wilcke, M.D., Ph.D., Vibeke Gottlieb, M.D., Ph.D., Kjell Erik Julius Håkansson, M.D., Casper Tidemansen, M.D., Oliver Tupper, M.D., Ph.D., Howraman Meteran, M.D., Christina Bergsøe, B.Sc., Uffe Christian Steinholtz Bødtger, M.D., Ph.D., Daniel Bech Rasmussen, M.D., Ph.D., Sidse Graff Jensen, M.D., Ph.D., Lars Pedersen, M.D., Ph.D., Alexander Jordan, B.Sc., Helene Priemé, M.D., Ph.D., Christian Søborg, M.D., Ph.D., Ida E. Steffensen, M.D., Ph.D., Dorthe Høgsberg, R.N., Tobias Wirefeldt Klausen, M.Sc., Ph.D., Martin Steen Frydland, M.D., Ph. D., Peter Lange, M.D., D.M.Sc., Asger Sverrild, M.D., Ph.D., Muhzda Ghanizada, M.D., Filip Krag Knop, M.D., Ph.D., Tor Biering-Sørensen, M.D., Ph.D., Jens D. Lundgren, M.D., D.M.Sc. and Jens-Ulrik Stæhr Jensen, M.D., Ph.D. [protocol chair, Copenhagen COP:TRIN lead]) of the ProPAC-COVID Study Group assume responsibility for the overall content and integrity of this article. The affiliations of the members of the writing group are listed in the Appendix.

#### Table of Contents

|                                                                                                                                                    |    |
|----------------------------------------------------------------------------------------------------------------------------------------------------|----|
| Section 1. Writing committee members and collaborators .....                                                                                       | 2  |
| Section 3. Trial eligibility criteria.....                                                                                                         | 3  |
| Section 4. Interim analyses .....                                                                                                                  | 5  |
| eTable 1. Medication prior to hospital admission .....                                                                                             | 6  |
| eTable 2. Chronic conditions .....                                                                                                                 | 7  |
| eTable 3. Medications received during hospital admission (before and after randomisation).....                                                     | 8  |
| eTable 4. Adherence to trial drugs.....                                                                                                            | 9  |
| Abbreviation: IQR, interquartile range .....                                                                                                       | 9  |
| eTable 5. Subgroup analyses, all according to baseline values: Treatment group difference (hydroxychloroquine and azithromycin minus placebo)..... | 10 |
| eTable 6. Secondary outcomes – Ordinal day 15.....                                                                                                 | 11 |
| eTable 7. Secondary outcomes – Ordinal day 5.....                                                                                                  | 12 |
| eTable 8. Adverse events by organ system .....                                                                                                     | 13 |
| eTable 9. Sensitivity analysis for primary outcome.....                                                                                            | 14 |
| Figure S2. Time to readmission or death within 30 days, adjusted analyses .....                                                                    | 15 |
| Figure S3. Time to no oxygen within 14 days, adjusted analyses .....                                                                               | 16 |
| Figure S4. Change in corrected QT interval for hydroxychloroquine and azithromycin group vs. placebo group .....                                   | 17 |

This supplemental material has been provided by the authors to give readers additional information about their work.

## Section 1. Writing committee members and collaborators

*\*Clinical Centre or Clinical Coordinating Centre Principal Investigator*

**Aalborg University Hospital:** Ulla Møller Weinreich\*

**Bispebjerg & Frederiksberg Hospital:** Lars Pedersen\*, Therese Sophie Lapperre, Andreas Geest, Asger Sverrild, Celeste Porsbjerg, Charlotte Bernhoff, Christian Uggerhøj Wøhlk, Kelly Yeung, Mette Boye, Muzhda Ghanizada, Stine Johnsen, Tonny Studsgaard Petersen, Mette Kongstad, Sisse Bolm Ditlev, Lars Erik Kristensen

**Gentofte University Hospital:** Jens-Ulrik Jensen\*, Pradeesh Sivapalan, Alexander Svorre Jordan, Amalia Lærke Kjær Heltø, Benzu Izgi, Christian Rønn, Conrad Becker Schultz, Dorthe Sandbæk Høgsberg, Emma Petersen, Jens-Kristian Bomholt-Riis, Jon Torgny Rostrup Wilcke, Josefin Eklöf, Karin Armbruster, Katja Bergenholtz, Louise Amstrup Fournais, Martina Bjørka Fosgaard, Mette Vang Larsen, Mohamad Isam Saeed, Saher Burhan Shaker, Sarah Altaraihi, Sidse Graff Jensen, Tine Peick Sonne, Freja Stæhr Holm

**Herlev Hospital:** Peter Lange, Helene Priemé, Christian Søborg, Ida Elisabeth Steffensen, Hans Henrik Schultz, Anna Kjær Kristensen, Howraman Meteran, Vibeke Gottlieb, Casper Guldager, Ema Rastoder, Nuria Mohamed Shishay Hissabu, Camilla Kara Svensson, Monica Christina Zwicki Meulengracht, Andreas Geest, Ditte Hansen, Malene Rohr Andersen

**Hvidovre & Amager University Hospital:** Charlotte Suppli Ulrik\*, Kjell Erik Julius Håkansson, Casper Tidemandsen, Eva Brøndum, Christina Bergsøe, Oliver Djurhuus Tupper, Julie Janner, Maria Heidemann, Mia Moberg, Susanne Wiemann Sørensen, Amalie Kargaard Jensen, Annette Rank, Martin Steen Frydland

**Nordsjællands Hospital:** Andrea Browatzki\*, Birgitte Lindegaard Madsen, Peter Kamstrup, Thyge Nielsen, Zitta Harboe, Christian Corfitz Andersen,

**Odense University Hospital:** Christian Borbjerg Laursen\*

**Rigshospitalet:** Anders Perner, Jens Kastrup, Jens Dilling Lundgren

**Zealand University Hospital, Roskilde:** Christian Niels Meyer\*, Shailesh Balasaheb Kolekar, Peter Hammerslev, Rikke Borg, Lothar Wiese

**Slagelse Hospital:** Uffe Christian Steinholtz Bødtger\*, Bodil Charlotte Arp, Daniel Bech Rasmussen, Gitte Alstrup, Rasmus Dahlin Bojesen.

**Study director:** Jens-Ulrik Stæhr Jensen

**Principal investigator:** Jens-Ulrik Stæhr Jensen

**Coordinating investigator:** Pradeesh Sivapalan

**Steering Committee:** Jens-Ulrik Stæhr Jensen, Charlotte Ulrik, Pradeesh Sivapalan

**The GCP unit - Research - The Capital of Region of Denmark:** Kristina Devantier

**Statistician:** Tobias Wirenfeldt Klausen

## Section 2. Data Safety Monitoring Board (DSMB)

Dr John Hurst PhD FRCP (Chair)  
Reader in Respiratory Medicine  
Royal Free Campus  
UCL Medical School

Philipp Schuetz, Professor, Dr.Med. MPH  
Kantonspital Aarau AG |  
KSA · Internal Medicine & Emergency Medicine  
Switzerland

Bodil Steen Rasmussen  
Clinical Professor, Anaesthesia and Intensive Care Medicine, Aalborg University Hospital and President of EACTA -  
Aalborg Universitetshospital

## Section 3. Trial eligibility criteria

The complete inclusion and exclusion criteria from the protocol are given below.

### Inclusion criteria

- Patient admitted to Danish emergency departments, respiratory medicine departments or internal medicine departments
- Age  $\geq$  18 years
- Hospitalised  $\leq$  48 h
- Positive SARS-CoV-2 test/diagnosis during the hospitalisation (confirmed).
- Men or non-fertile women. Fertile women\* must not be pregnant: i.e., negative pregnancy test must be available at inclusion
- Informed consent signed

\*Defined as after menarche and until postmenopausal (no menstruation for 12 months)

### Exclusion criteria

- At the time of recruitment, the patient uses  $> 5$  LO<sub>2</sub>/min (equivalent to 40% FiO<sub>2</sub> if measured)
- Known intolerance/allergy to azithromycin or hydroxychloroquine or hypersensitivity to quinine or 4-aminoquinoline derivatives
- Neurogenic hearing loss
- Psoriasis
- Retinopathy
- Maculopathy
- Visual field changes
- Breastfeeding
- Severe liver diseases other than amoebiasis (spontaneous INR  $> 1.5$ )
- Severe gastrointestinal, neurological and haematological disorders (investigator-assessed)
- eGFR  $< 45$  mL/min/1.73 m<sup>2</sup>
- Clinically significant cardiac conduction disorders/arrhythmias or prolonged QTc interval (QTc (f) of  $> 480/470$  ms).
- Myasthenia gravis
- Treatment with digoxin\*
- Glucose-6-phosphate dehydrogenase deficiency
- Porphyria
- Hypoglycaemia (blood glucose at any time since hospitalisation of  $< 3.0$  mmol/L)
- Severe mental illness which significantly impedes cooperation

- Severe linguistic problems that significantly hinder cooperation
- Treatment with ergot alkaloids

\*The patient must not be treated with digoxin for the duration of the intervention. For atrial fibrillation/flutter, select according to the Cardiovascular National Treatment Guide (NBV): calcium antagonist, beta blocker, direct current (DC) conversion or amiodarone. In case of urgent need for digoxin treatment (contraindication for the aforementioned equal alternatives), the test drug should be paused, and ECG should be recorded daily.

**Figure S1. Total number of patients ( $n = 117$ ) recruited per trial site**

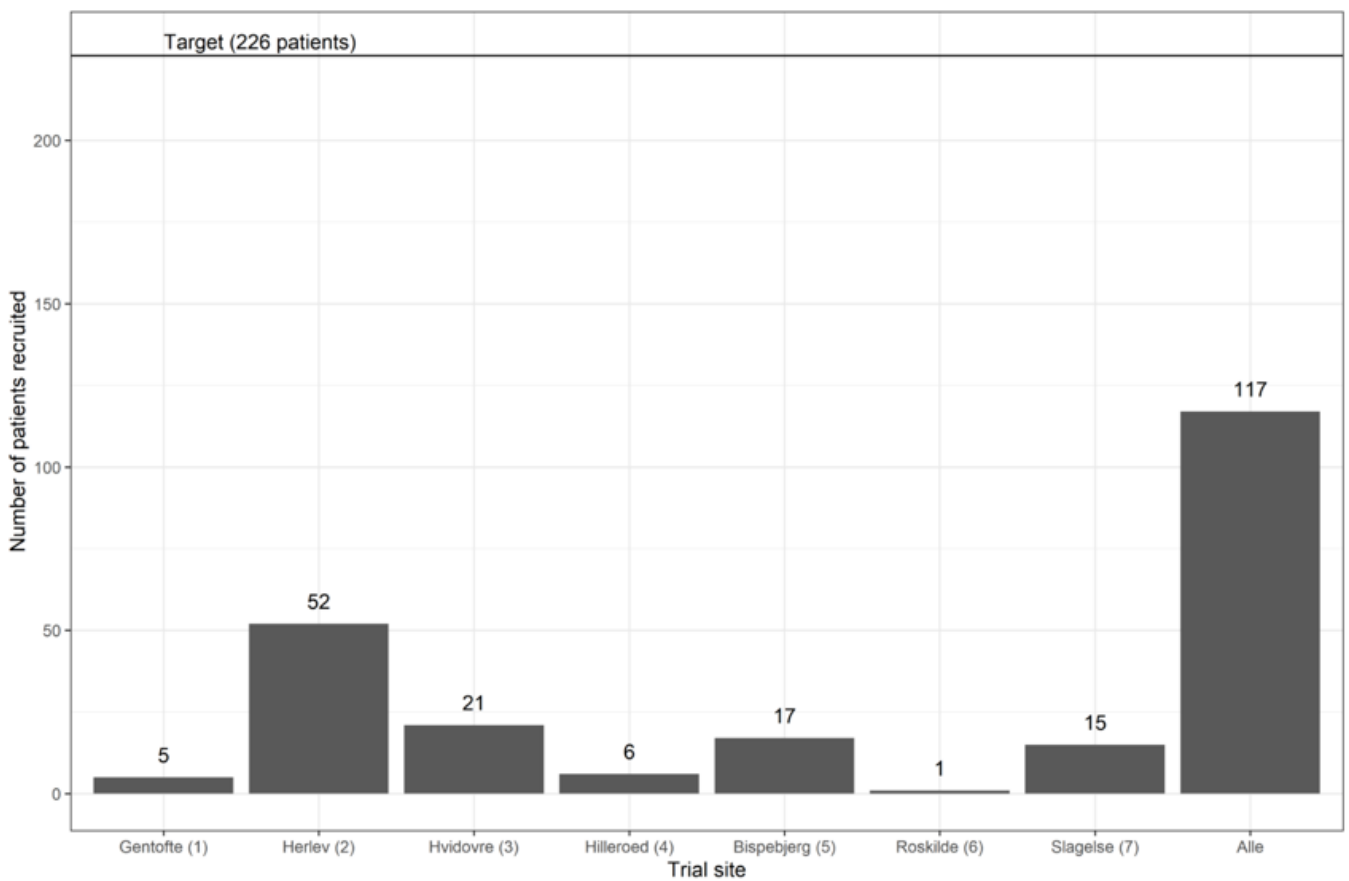

## Section 4. Interim analyses

An independent data and safety monitoring board (DSMB) oversaw the conduct of the trial and reviewed two interim analyses. Data monitoring guidelines, both interim analysis reports and corresponding DSMB recommendation letters, are attached in Supplemental Appendix 4.

The interim analyses were centred on systematic analyses of

1. Days alive and out of hospital within 14 days after recruitment (primary study outcome)
2. 30-day mortality rate (secondary study outcome)
3. Readmission (all causes) within 30 days (secondary study outcome)

The DSMB recommended stopping enrolment prior to its completion if the intervention was associated with adverse effects that called into question the safety of the intervention.

Moreover, with regards to efficacy, a post-conditional power analysis of the primary outcome was included in the second interim analysis with a pre-specified stopping-criterion for futility set at 0.20.

The date, number of patients reviewed and outcome of each interim analysis are listed in the table below.

| <b>Interim Analysis Number (date)</b> | <b>Enrolled patients with primary outcome data in dataset, no.</b> | <b>Enrolled patients with baseline data in dataset, no.</b> | <b>DSMB Recommendation</b>                                                 |
|---------------------------------------|--------------------------------------------------------------------|-------------------------------------------------------------|----------------------------------------------------------------------------|
| # 1 (31 May 2020)*                    | 75                                                                 | 65                                                          | No safety concerns.<br>Continue trial as planned.                          |
| # 2 (28 January 2021)**               | 117                                                                | 117                                                         | No safety concerns.<br>Stop trial due to very low probability of futility. |

\* The first interim analysis was conducted in May 2020, as an “acute”, not pre-planned, analysis due to published reports raising concern of severe cardiac side effects attributable to hydroxychloroquine.

\*\*The second interim analysis, in January 2021, was the first pre-planned analysis when half of the patients were recruited.

**Table E1. Medication prior to hospital admission**  
(baseline characteristics in addition to those listed in Table 1)

| <b>Medication – no. (%)</b>                        | <b>All<br/>(n = 117)</b> | <b>Hydroxychloroquine<br/>and azithromycin<br/>(n = 61)</b> | <b>Placebo<br/>(n = 56)</b> |
|----------------------------------------------------|--------------------------|-------------------------------------------------------------|-----------------------------|
| <b>Long-acting beta2-agonist</b>                   | 21 (18)                  | 11 (18)                                                     | 10 (18)                     |
| <b>Long-acting muscarinic<br/>antagonist</b>       | 10 (9)                   | 8 (13)                                                      | 2 (4)                       |
| <b>Inhaled corticosteroids</b>                     | 23 (20)                  | 11 (18)                                                     | 12 (21)                     |
| <b>Short-acting beta2-agonist</b>                  | 27 (23)                  | 16 (26)                                                     | 11 (20)                     |
| <b>Short-acting muscarinic<br/>antagonist</b>      | 8 (7)                    | 6 (10)                                                      | 2 (4)                       |
| <b>Roflumilast (PDE4<br/>inhibitor)</b>            | 0 (0)                    | 0 (0)                                                       | 0 (0)                       |
| <b>Montelukast<br/>(Antileukotriene)</b>           | 1 (1)                    | 1 (2)                                                       | 0 (0)                       |
| <b>Long-term antibiotic<br/>treatment</b>          | 2 (2)                    | 0 (0)                                                       | 2 (4)                       |
| <b>Theophylline</b>                                | 0 (0)                    | 0 (0)                                                       | 0 (0)                       |
| <b>Statins</b>                                     | 35 (30)                  | 17 (28)                                                     | 18 (32)                     |
| <b>Long-term oral<br/>corticosteroid treatment</b> | 6 (5)                    | 3 (5)                                                       | 3 (5)                       |
| <b>Furosemide</b>                                  | 11 (9)                   | 7 (11)                                                      | 4 (7)                       |

Abbreviation: PDE4, phosphodiesterase-4.

**Table E2. Chronic conditions**

(baseline characteristics in addition to those listed in Table 1)

| <b>Chronic condition – no. (%)</b>                                             | <b>All<br/>(n = 117)</b> | <b>Hydroxychloroquine<br/>and azithromycin<br/>(n = 61)</b> | <b>Placebo<br/>(n = 56)</b> |
|--------------------------------------------------------------------------------|--------------------------|-------------------------------------------------------------|-----------------------------|
| Allergy                                                                        | 28 (24)                  | 18 (30)                                                     | 10 (18)                     |
| Diabetes mellitus Type I                                                       | 1 (1)                    | 0 (0)                                                       | 1 (2)                       |
| Diabetes mellitus Type II                                                      | 26 (22)                  | 17 (28)                                                     | 9 (16)                      |
| Diabetes mellitus, other type<br>(e.g., mature-onset diabetes of<br>the young) | 0 (0)                    | 0 (0)                                                       | 0 (0)                       |
| Diabetes mellitus, unknown<br>type                                             | 1 (1)                    | 0 (0)                                                       | 1 (2)                       |
| Atrial fibrillation                                                            | 21 (18)                  | 15 (25)                                                     | 6 (11)                      |
| Essential hypertension                                                         | 45 (38)                  | 21 (34)                                                     | 24 (43)                     |
| Osteoporosis                                                                   | 7 (6)                    | 3 (5)                                                       | 4 (7)                       |
| Peripheral vascular disease                                                    | 3 (3)                    | 1 (2)                                                       | 2 (4)                       |
| Cerebrovascular disease                                                        | 12 (10)                  | 6 (10)                                                      | 6 (11)                      |
| Haematological diseases                                                        | 4 (3)                    | 2 (3)                                                       | 2 (4)                       |
| Depression                                                                     | 12 (10)                  | 7 (11)                                                      | 5 (9)                       |
| Past or present lung cancer                                                    | 1 (1)                    | 0 (0)                                                       | 1 (2)                       |
| Previous cancer (which is not<br>lung cancer)                                  | 19 (16)                  | 11 (18)                                                     | 8 (14)                      |
| Former deep vein thrombosis<br>or pulmonary embolism                           | 7 (6)                    | 5 (8)                                                       | 2 (4)                       |
| Liver failure                                                                  | 0 (0)                    | 0 (0)                                                       | 0 (0)                       |
| Rheumatic diseases                                                             | 14 (12)                  | 6 (10)                                                      | 8 (14)                      |

**Table E3. Medications received during hospital admission (before and after randomisation)**

| <b>Medication – no. (%)</b>                                      | <b>All<br/>(n = 117)</b> | <b>Hydroxychloroquine<br/>and azithromycin<br/>(n = 61)</b> | <b>Placebo<br/>(n = 56)</b> |
|------------------------------------------------------------------|--------------------------|-------------------------------------------------------------|-----------------------------|
| Any antibiotics                                                  | 77 (66)                  | 36 (59)                                                     | 41 (73)                     |
| Ciprofloxacin                                                    | 1 (1)                    | 0 (0)                                                       | 1 (2)                       |
| Piperacillin/tazobactam                                          | 54 (46)                  | 24 (39)                                                     | 30 (54)                     |
| Ceftazidime                                                      | 1 (1)                    | 1 (2)                                                       | 0 (0)                       |
| Meropenem                                                        | 3 (3)                    | 2 (3)                                                       | 1 (2)                       |
| Colistin                                                         | 0 (0)                    | 0 (0)                                                       | 0 (0)                       |
| Gentamycin                                                       | 1 (1)                    | 1 (2)                                                       | 0 (0)                       |
| Amoxicillin                                                      | 14 (12)                  | 5 (8)                                                       | 9 (16)                      |
| Amoxicillin/Clavulanic                                           | 11 (9)                   | 6 (10)                                                      | 5 (9)                       |
| Sulid                                                            | 0 (0)                    | 0 (0)                                                       | 0 (0)                       |
| Dicloxacillin                                                    | 1 (1)                    | 1 (2)                                                       | 0 (0)                       |
| Penicillin                                                       | 16 (14)                  | 11 (18)                                                     | 5 (9)                       |
| Azithromycin                                                     | 0 (0)                    | 0 (0)                                                       | 0 (0)                       |
| Other antibiotics                                                | 23 (20)                  | 10 (16)                                                     | 13 (23)                     |
| Remdesivir                                                       | 28 (25)                  | 13 (22)                                                     | 15 (28)                     |
| Dexamethasone                                                    | 36 (32)                  | 17 (28)                                                     | 19 (35)                     |
| Corticosteroids other than dexamethasone                         | 17 (15)                  | 10 (16)                                                     | 7 (12)                      |
| Days with antibiotics, median (IQR)                              | 4.5 (3.0–6.0)            | 5.0 (3.0–6.0)                                               | 4.2 (3.0–6.0)               |
| Days with dexamethasone, median (IQR)                            | 6.0 (5.0–8.0)            | 6.0 (5.0–9.0)                                               | 6.0 (5.0–7.0)               |
| Days with corticosteroids other than dexamethasone, median (IQR) | 5.0 (1.0–6.0)            | 3.5 (1.2–5.8)                                               | 6.0 (2.5–7.0)               |

Abbreviation: IQR, interquartile range



**Table E4. Adherence to trial drugs**

| <b>Adherence – no. (%)</b>                                     | <b>All<br/>(<i>n</i> = 117)</b> | <b>Hydroxychloroquine<br/>and azithromycin<br/>(<i>n</i> = 61)</b> | <b>Placebo<br/>(<i>n</i> = 56)</b> |
|----------------------------------------------------------------|---------------------------------|--------------------------------------------------------------------|------------------------------------|
| Started azithromycin                                           | 108 (92)                        | 54 (89)                                                            | 54 (96)                            |
| Started hydroxychloroquine                                     | 107 (91)                        | 54 (89)                                                            | 53 (95)                            |
| Days with azithromycin, median (IQR)                           | 15 (4–15)                       | 15 (2–15)                                                          | 15 (7–15)                          |
| Days with hydroxychloroquine, median (IQR)                     | 15 (3–15)                       | 14 (2–15)                                                          | 15 (7–15)                          |
| Days with azithromycin and hydroxychloroquine,<br>median (IQR) | 14 (3–15)                       | 14 (2–15)                                                          | 13 (7–15)                          |

Abbreviation: IQR, interquartile range

**Table E5. Subgroup analyses, all according to baseline values: Treatment group difference (hydroxychloroquine and azithromycin minus placebo)**

| <b>Characteristics</b>                         | <b>Treatment group difference</b> | <b>P-value</b> |
|------------------------------------------------|-----------------------------------|----------------|
| <b>Chronic obstructive pulmonary disease</b>   |                                   |                |
| Yes                                            | 0.12 (-2.83-3.06)                 | 0.9345         |
| No                                             | -0.79 (-2.54-0.96)                | 0.3714         |
| <b>QTc greater than the group median value</b> |                                   |                |
| QTc $\geq$ 417                                 | -0.15 (-2.31-2.01)                | 0.8916         |
| QTc < 417                                      | -1.00 (-3.00-1.01)                | 0.3239         |
| <b>Nasal oxygen supply</b>                     |                                   |                |
| $\geq$ 2 L/min                                 | 0.35 (-2.09-2.78)                 | 0.7739         |
| < 2 L/min                                      | -1.35 (-3.12-0.42)                | 0.1337         |
| <b>C-reactive protein</b>                      |                                   |                |
| $\geq$ 50                                      | -0.57 (-2.60-1.46)                | 0.5766         |
| < 50                                           | -0.52 (-2.73-1.69)                | 0.6382         |
| <b>Fibrin d-dimer</b>                          |                                   |                |
| $\geq$ 0.8                                     | 0.36 (-3.82-4.54)                 | 0.5766         |
| < 0.8                                          | -0.63 (-2.20-0.94)                | 0.6382         |
| <b>Remdesivir as concomitant medication</b>    |                                   |                |
| Yes                                            | -1.74 (-4.52-1.04)                | 0.2063         |
| No                                             | -0.28 (-2.15-1.58)                | 0.7614         |

Abbreviation: QTc, corrected QT interval

**Table E6. Secondary outcomes – Ordinal day 15**

| <b>Clinical status (COVID Outcomes Scale category) – no. (%)</b>                                            | <b>Hydroxychloroquine and azithromycin (n = 61)</b> | <b>Placebo (n = 56)</b> | <b>P-value</b> |
|-------------------------------------------------------------------------------------------------------------|-----------------------------------------------------|-------------------------|----------------|
| 1. Discharged with no limitations on activities                                                             | 26 (43)                                             | 22 (39)                 |                |
| 2. Discharged with limitations on activities: may be free of oxygen therapy or be on LTOT                   | 26 (43)                                             | 27 (48)                 |                |
| 3. Admitted and without oxygen but not receiving treatment (observation only)                               | 1 (2)                                               | 0 (0)                   |                |
| 4. Admitted and without oxygen but receiving treatment (COVID-19-related or other)                          | 1 (2)                                               | 2 (4)                   |                |
| 5. Admitted and on other oxygen supplement different from (2) or (3) such as oxygen through a nasal cannula | 2 (3)                                               | 2 (4)                   |                |
| 6. Admitted and on non-invasive ventilation or "high-flow oxygen device"                                    | 1 (2)                                               | 0 (0)                   |                |
| 7. Admitted and on mechanical ventilation or ECMO                                                           | 3 (5)                                               | 1 (2)                   |                |
| 8. Dead                                                                                                     | 1 (2)                                               | 2 (4)                   |                |
| Proportional odds model, odds ratio                                                                         | 1.0 (0.5–2.2)                                       | Ref                     | 0.91           |

Abbreviations: LTOT, long-term oxygen therapy; ECMO, extra corporeal membrane oxygenation.

**Table E7. Secondary outcomes – Ordinal day 5**

| <b>Clinical status (COVID Outcomes Scale category) – no. (%)</b>                                            | <b>Hydroxychloroquine and azithromycin (n = 61)</b> | <b>Placebo (n = 56)</b> |
|-------------------------------------------------------------------------------------------------------------|-----------------------------------------------------|-------------------------|
| 1. Discharged with no limitations on activities                                                             | 19 (31)                                             | 16 (29)                 |
| 2. Discharged with limitations on activities: may be free of oxygen therapy or be on LTOT                   | 14 (23)                                             | 13 (23)                 |
| 3. Admitted and without oxygen but not receiving treatment (observation only)                               | 4 (7)                                               | 9 (16)                  |
| 4. Admitted and without oxygen but receiving treatment (COVID-19-related or other)                          | 10 (16)                                             | 6 (11)                  |
| 5. Admitted and on other oxygen supplement different from (2) or (3) such as oxygen through a nasal cannula | 9 (15)                                              | 11 (20)                 |
| 6. Admitted and on non-invasive ventilation or "high-flow oxygen device"                                    | 3 (5)                                               | 1 (2)                   |
| 7. Admitted and on mechanical ventilation or ECMO                                                           | 2 (3)                                               | 0 (0)                   |
| 8. Dead                                                                                                     | 0 (0)                                               | 0 (0)                   |
| Proportional odds model, odds ratio                                                                         | 0.9 (0.4–1.8)                                       | Ref                     |

Abbreviations: LTOT, long-term oxygen therapy; ECMO, extra corporeal membrane oxygenation.

**Table E8. Adverse events by organ system**

Adverse events (AEs) were reported by site investigators, who were blinded to randomised groups, to the Clinical Coordinating Centre.

The site investigator who reported each adverse event classified it as serious or not serious and evaluated relatedness to study procedures. Individual patients could experience more than one adverse event. Adverse events were recorded during the period beginning when the patient received their first dose of trial medication up to and including day 15.

A serious adverse event (SAE) was defined as an event or adverse event that, regardless of dose, was life-threatening, resulted in significant or persistent disability or incapacity, or led to a congenital anomaly or malformation.

Because comorbidities and mortality are common in this patient group, prolonged admission, re-admission, non-invasive ventilation, invasive respiratory treatment and death were not considered SAEs.

This table displays all adverse events reported in the trial and whether each adverse event was classified as a serious adverse event.

| <b>Organ system</b>                             | <b>Adverse event</b>   | <b>All Adverse events, no.</b> | <b>Hydroxychloroquine and Azithromycin Adverse event, no.</b> | <b>Placebo Adverse event, no.</b> |
|-------------------------------------------------|------------------------|--------------------------------|---------------------------------------------------------------|-----------------------------------|
| Cardiac disorders                               | Prolonged QTc          | 11                             | 4                                                             | 7                                 |
|                                                 | Chest pain             | 7                              | 3                                                             | 4                                 |
|                                                 | Myocardial infarction  | 0                              | 0                                                             | 0                                 |
|                                                 | Ventricular arrhythmia | 1                              | 0                                                             | 1                                 |
| Endocrine disorders                             | Hypoglycaemia          | 0                              | 0                                                             | 0                                 |
| Gastrointestinal disorders                      | Diarrhoea              | 15                             | 12                                                            | 3                                 |
|                                                 | Vomiting               | 4                              | 2                                                             | 2                                 |
|                                                 | Nausea                 | 17                             | 11                                                            | 6                                 |
|                                                 | Abdominal pain         | 14                             | 7                                                             | 7                                 |
| Nervous system and psychiatric disorders        | Headache               | 8                              | 3                                                             | 5                                 |
|                                                 | Photophobia            | 0                              | 0                                                             | 0                                 |
|                                                 | Dizziness              | 13                             | 10                                                            | 3                                 |
|                                                 | Hearing loss           | 1                              | 0                                                             | 1                                 |
|                                                 | Seizure                | 0                              | 0                                                             | 0                                 |
|                                                 | Stroke                 | 0                              | 0                                                             | 0                                 |
| Respiratory, thoracic and mediastinal disorders | Bronchospasm           | 5                              | 3                                                             | 2                                 |

|                                        |                 |            |           |           |
|----------------------------------------|-----------------|------------|-----------|-----------|
| Skin and subcutaneous tissue disorders | Itching<br>Rash | 3          | 3         | 0         |
| Vascular disorders                     | Bleeding        | 2          | 2         | 0         |
| Any serious adverse events             |                 | 2          | 0         | 2         |
| <b>TOTAL</b>                           |                 | <b>103</b> | <b>60</b> | <b>43</b> |

Abbreviation: QTc, corrected QT interval

**Table E9. Sensitivity analysis for primary outcome**

| <b>Outcome</b>                                                                                       | <b>Hydroxychloroquine plus azithromycin</b> | <b>Placebo</b>   | <b>P-value</b> |
|------------------------------------------------------------------------------------------------------|---------------------------------------------|------------------|----------------|
| <b>Adjusted* days alive and out of hospital at 14 days, estimated mean difference (95% CI), days</b> | <b>-0.43 (95% CI -3.77–2.92)</b>            | <b>Reference</b> | <b>0.80</b>    |

\*Adjusted for age (per year increase), sex, body mass index (per unit increase), oxygen supply at baseline (yes/no), pre-existing lung disease (yes/no), diabetes (yes/no), remdesivir (yes/no), QTc across median (yes/no) and pack-years (current and ex-smokers).

**Figure S2. Time to readmission or death within 30 days, adjusted analyses**

Adjusted for age (per year increase), sex (male/female), body mass index (per unit increase), oxygen supply at baseline (yes/no), pre-existing lung disease (yes/no), diabetes mellitus (yes/no), remdesivir (yes/no), corrected QT interval across median (yes/no), C-reactive protein > 50 (yes/no) and cancer (yes/no).

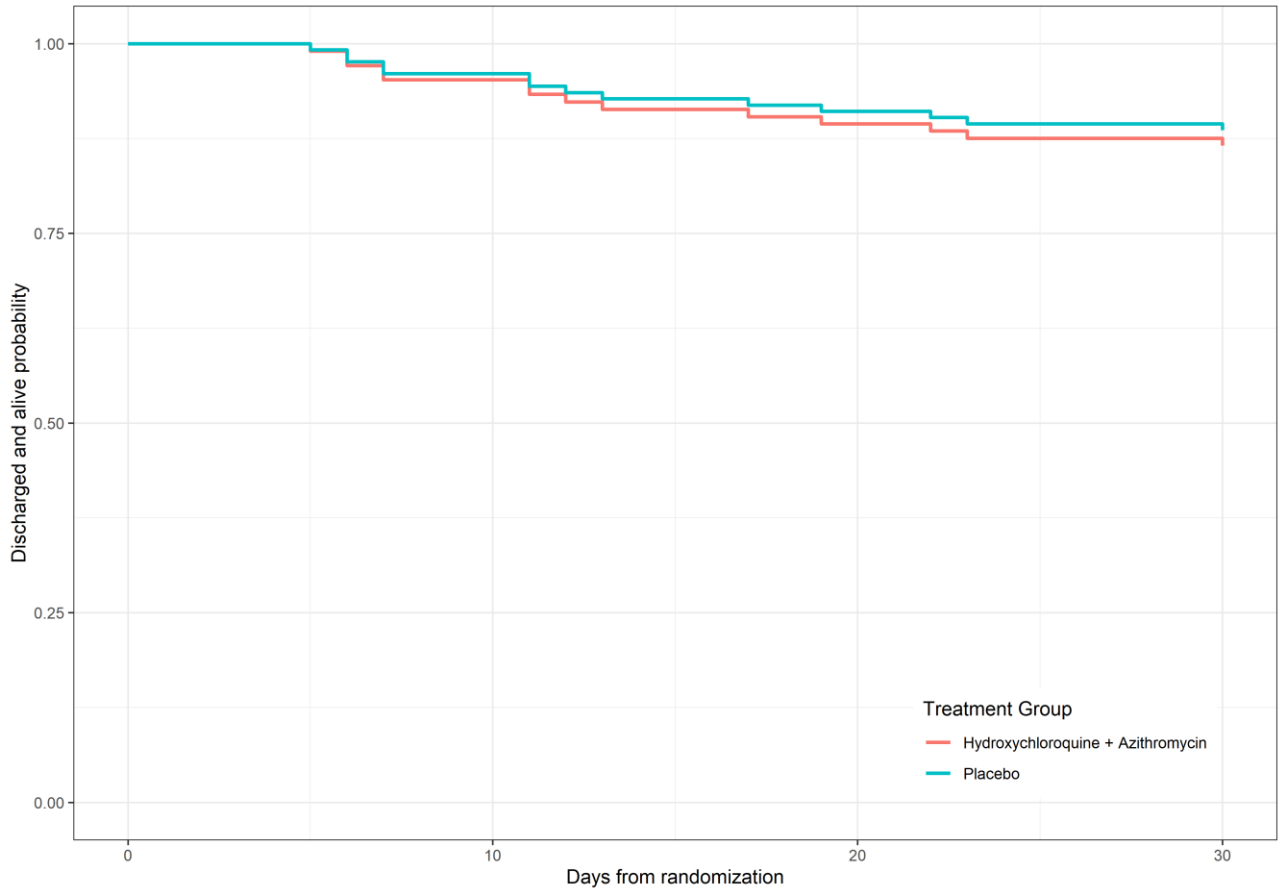

**Figure S3. Time to no oxygen within 14 days, adjusted analyses**

Adjusted for age (per year increase), sex (male/female), body mass index (per unit increase), oxygen supply at baseline (yes/no), pre-existing lung disease (yes/no), diabetes mellitus (yes/no), remdesivir (yes/no), corrected QT interval across median (yes/no), C-reactive protein > 50 (yes/no) and cancer (yes/no).

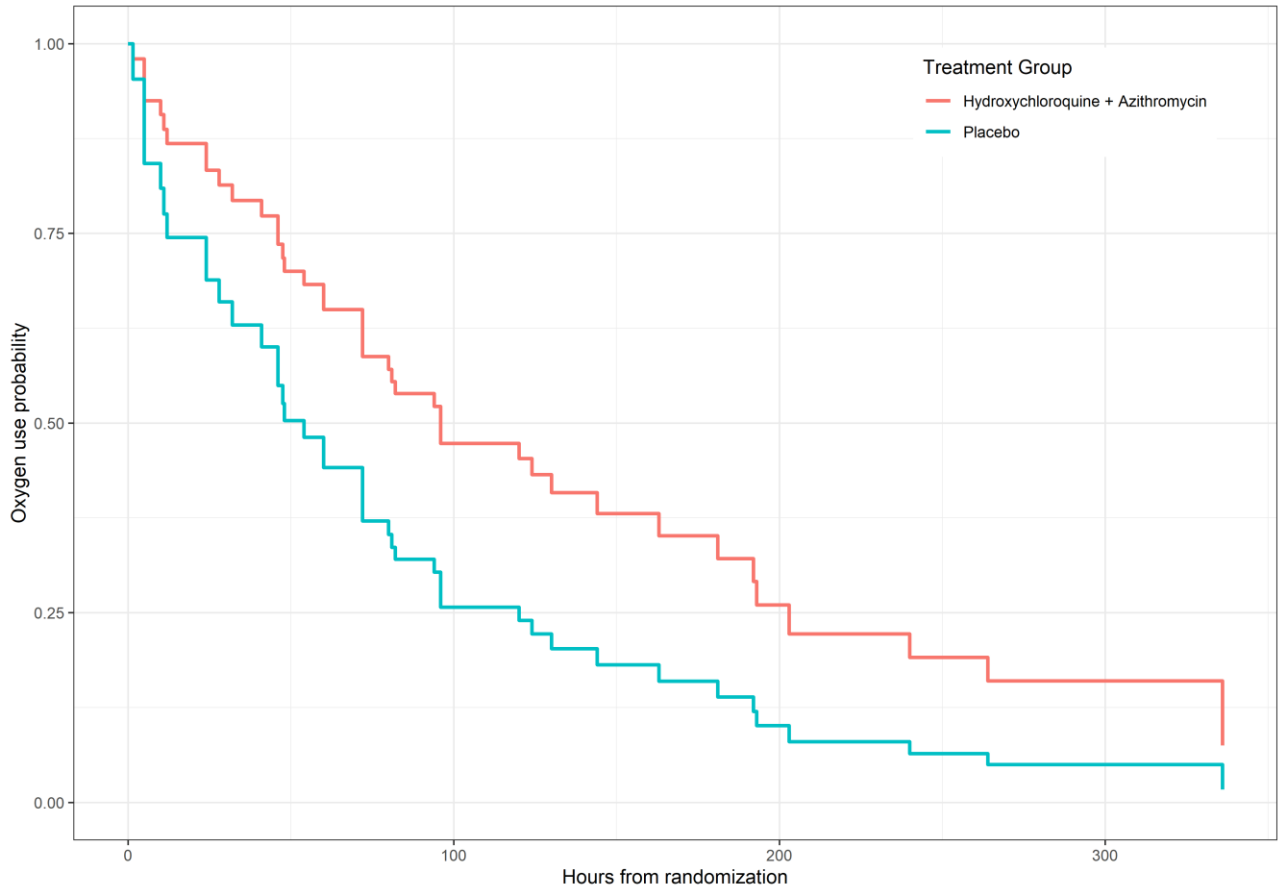



**Figure S4. Change in corrected QT interval for hydroxychloroquine and azithromycin group vs. placebo group**

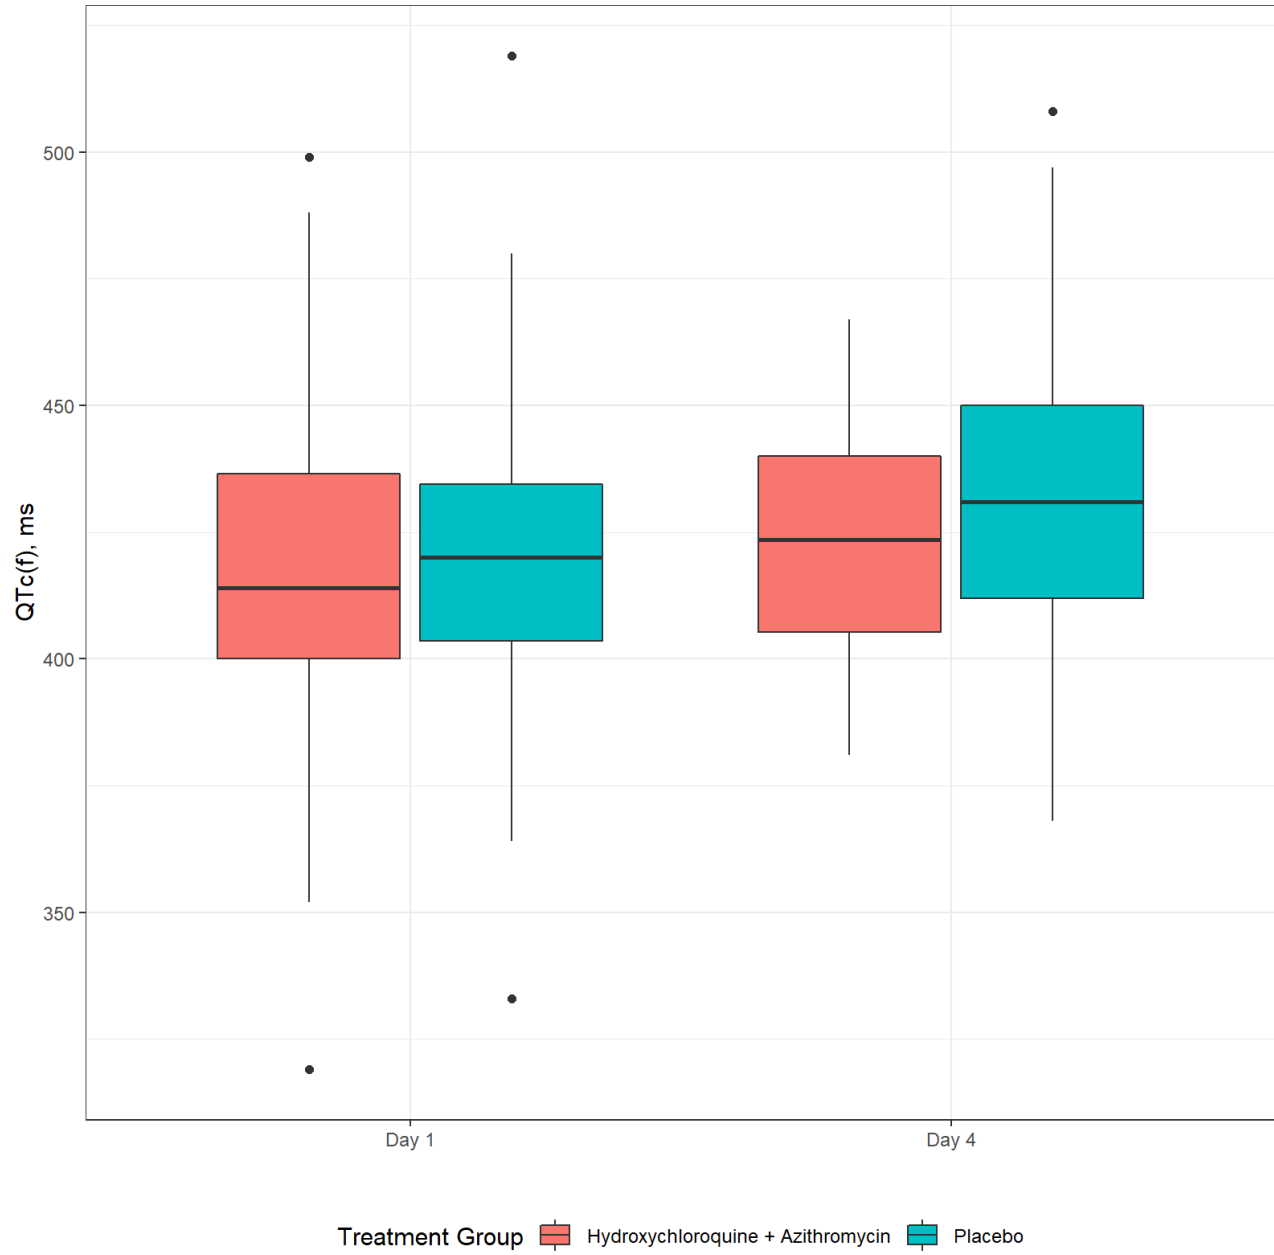

Supplement: ERJ-00752-2021.Appendix_3.pdf [file ERJ-00752-2021.Appendix_3.pdf]
