# Supplementary material for: Azithromycin and hydroxychloroquine in hospitalised patients with confirmed COVID-19: a randomised double-blinded placebo-controlled trial
Source: PubMed Central journal article supplement — Eur Respir J. 2022 Jan 6;59(1):2100752. doi: 10.1183/13993003.00752-2021 (PMC8186006; doi:10.1183/13993003.00752-2021), 2022-01-06
Supplement: ERJ-00752-2021.Shareable.pdf [file ERJ-00752-2021.Shareable.pdf]

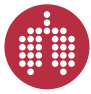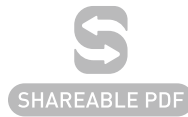

# Azithromycin and hydroxychloroquine in hospitalised patients with confirmed COVID-19: a randomised double-blinded placebo-controlled trial

Pradeesh Sivapalan<sup>1</sup>, Charlotte Suppli Ulrik<sup>2</sup>, Therese Sophie Lapperre<sup>3</sup>, Rasmus Dahlin Bojesen<sup>4,5</sup>, Josefin Eklöf<sup>1</sup>, Andrea Browatzki<sup>6</sup>, Jon Torgny Wilcke<sup>1</sup>, Vibeke Gottlieb<sup>1</sup>, Kjell Erik Julius Håkansson<sup>2</sup>, Casper Tidemandsen<sup>2</sup>, Oliver Tupper<sup>2</sup>, Howraman Meteran<sup>1</sup>, Christina Bergsøe<sup>2</sup>, Eva Brøndum<sup>2</sup>, Uffe Bødtger<sup>5,7</sup>, Daniel Bech Rasmussen<sup>4</sup>, Sidse Graff Jensen<sup>1</sup>, Lars Pedersen<sup>3</sup>, Alexander Jordan<sup>1</sup>, Helene Priemé<sup>8</sup>, Christian Søborg<sup>8</sup>, Ida E. Steffensen<sup>8</sup>, Dorthe Høgsberg<sup>1</sup>, Tobias Wirenfeldt Klausen<sup>8</sup>, Martin Steen Frydland<sup>2</sup>, Peter Lange<sup>8,9</sup>, Asger Sverrild<sup>3</sup>, Muhzda Ghanizada<sup>3</sup>, Filip K. Knop<sup>10,11</sup>, Tor Biering-Sørensen<sup>12</sup>, Jens D. Lundgren<sup>13</sup> and Jens-Ulrik Stæhr Jensen<sup>1,11</sup>, the ProPAC-COVID writing group on behalf of the ProPAC-COVID Study Group<sup>14</sup>

<sup>1</sup>Dept of Internal Medicine, Pulmonary Medicine Section, Gentofte University Hospital, Hellerup, Denmark. <sup>2</sup>Dept of Respiratory Medicine, Respiratory Research Unit, Hvidovre and Amager University Hospital, Hvidovre, Denmark. <sup>3</sup>Dept of Respiratory Medicine, Bispebjerg and Frederiksberg Hospital, Copenhagen, Denmark. <sup>4</sup>Dept of Surgery, Slagelse Hospital, Slagelse, Denmark. <sup>5</sup>Dept of Respiratory Medicine, Næstved Hospital, Næstved, Denmark. <sup>6</sup>Dept of Respiratory and Infectious Diseases, Nordsjællands Hospital, Hillerød, Denmark. <sup>7</sup>Institute of Regional Health Research, University of Southern Denmark, Odense, Denmark. <sup>8</sup>Dept of Medicine, Section of Respiratory Medicine, Herlev Hospital, Herlev, Denmark. <sup>9</sup>Institute of Public Health, Section of Epidemiology, University of Copenhagen, Copenhagen, Denmark. <sup>10</sup>Center for Clinical Metabolic Research, Gentofte University Hospital, Hellerup, Denmark. <sup>11</sup>Dept of Clinical Medicine, Faculty of Health and Medical Sciences, University of Copenhagen, Copenhagen, Denmark. <sup>12</sup>Dept of Cardiology, Gentofte University Hospital, Hellerup, Denmark. <sup>13</sup>Dept of Infectious Medicine, Rigshospitalet, Copenhagen, Denmark. <sup>14</sup>A complete list of members of the Proactive Protection with Azithromycin and hydroxyChloroquine in Hospitalised Patients With COVID-19 (ProPAC-COVID) Study Group is provided in supplementary appendix 3.

Corresponding author: Jens-Ulrik Stæhr Jensen ([jens.ulrik.jensen@regionh.dk](mailto:jens.ulrik.jensen@regionh.dk))

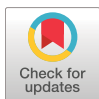

Shareable abstract (@ERSpublications)

There are no beneficial or harmful effects from the combined intervention of hydroxychloroquine and azithromycin for hospitalised patients with confirmed coronavirus disease 2019 (COVID-19)  
<https://bit.ly/3c0s6XG>

**Cite this article as:** Sivapalan P, Ulrik CS, Lapperre TS, *et al.* Azithromycin and hydroxychloroquine in hospitalised patients with confirmed COVID-19: a randomised double-blinded placebo-controlled trial. *Eur Respir J* 2022; 59: 2100752 [DOI: 10.1183/13993003.00752-2021].

This single-page version can be shared freely online.

## Abstract

**Background** Combining the antibiotic azithromycin and hydroxychloroquine induces airway immunomodulatory effects, with the latter also having *in vitro* antiviral properties. This may improve outcomes in patients hospitalised for coronavirus disease 2019 (COVID-19).

**Methods** Placebo-controlled double-blind randomised multicentre trial. Patients aged  $\geq 18$  years, admitted to hospital for  $\leq 48$  h (not intensive care) with a positive severe acute respiratory syndrome coronavirus 2 (SARS-CoV-2) reverse transcription PCR test were recruited. The intervention was 500 mg daily azithromycin for 3 days followed by 250 mg daily azithromycin for 12 days combined with 200 mg twice-daily hydroxychloroquine for all 15 days. The control group received placebo/placebo. The primary outcome was days alive and discharged from hospital within 14 days (DAOH14).

**Results** After randomisation of 117 patients, at the first planned interim analysis, the data and safety monitoring board recommended stopping enrolment due to futility, based on pre-specified criteria. Consequently, the trial was terminated on 1 February 2021. 61 patients received the combined intervention and 56 patients received placebo. In the intervention group, patients had a median (interquartile range) 9.0 (3–11) DAOH14 *versus* 9.0 (7–10) DAOH14 in the placebo group ( $p=0.90$ ). The primary safety outcome,

Copyright ©The authors 2022.

This version is distributed under the terms of the Creative Commons Attribution Non-Commercial Licence 4.0. For commercial reproduction rights and permissions contact [permissions@ersnet.org](mailto:permissions@ersnet.org)

This article has supplementary material available from [erj.ersjournals.com](http://erj.ersjournals.com)

This article has an editorial commentary:  
<https://doi.org/10.1183/13993003.02002-2021>

Received: 15 March 2021

Accepted: 22 May 2021

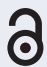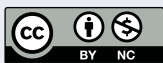

death from all causes on day 30, occurred for one patient in the intervention group *versus* two patients receiving placebo ( $p=0.52$ ), and readmittance or death within 30 days occurred for nine patients in the intervention group *versus* six patients receiving placebo ( $p=0.57$ ).

**Conclusions** The combination of azithromycin and hydroxychloroquine did not improve survival or length of hospitalisation in patients with COVID-19.
